# Supplementary material for: Snapshots of ABCG1 and ABCG5/G8: A Sterol’s Journey to Cross the Cellular Membranes
Source: MDPI journal article supplement (doi:10.3390/ijms24010484), 2022-12-28
Supplement: s1 [file s1]

## Human ABCG1 Sequence

>sp|P45844|ABCG1\_HUMAN ATP-binding cassette sub-family G member 1 OS=Homo sapiens OX=9606 GN=ABCG1 PE=1 SV=3 (**NP\_004906.3**)  
MACLMAAFSVGTAMNASSYSAEMTEPKSVCVSVDEVVSSNMEATETDLLNGHLKKVDNNL  
TEAQRFSLLPRRAAVNIEFRDLSYSVPEGPWWRKKGYKTLLKGISGKFNSGELVAIMGPS  
GAGKSTLMNILAGYRETGMKGAVLINGLPRDLRCFRKVSCYIMQDDMLLPHLTVQEAMMV  
SAHLKLOEKDEGRREMVKEILTALGLLSCANTRTGSLSGGQRKRLAIALELVNPPVMFF  
DEPTSGLDSASCFQVVSMLKGLAQGGRSIICTIHQPSAKLFELFDQLYVLSQGGQCVYRGK  
VCNLVPYLRDLGLNCPYHNPADFVMEVASGEYGDQNSRLVRVREGMCDSDHKRDLGGD  
AEVNPFLWHRPSEEVKQTKRLKGLRKDSSSMEGCHSFSASCLTQFCILFKRTFLSIMRDS  
VLTHLRITSHIGIGLLIGLLYLIGNEAKKVLNSNGFLFFSMLFLMFAALMPTVLTFFLE  
MGVFLREHLNLYWSLKAYYLAKTMADVFPQIMFPVAYCSIVYWMTSQPSDAVRFVLFAL  
GTMTSLVAQSLGLLIGAASSTSLQVATFVGPVTAIPVLLFSGFFVSFDTIPTYLQWMSYIS  
YVRYGFEGVILSIYGLDREDLHCDIDETCHFQKSEAILRELDVENAKLYLDFIVLGIFFI  
SLRLIAYFVRLRYKIRAER

### Sequence Alignment (5 representative mammalian species with human sequence in bold):

→ Conserved polar residues are highlighted based on conservation scores obtained from analysis and alignment of 950 mammalian ABCG1 sequences using **BLASTp**. The conservation scores were obtained by Consurf ([https://consurf.tau.ac.il/consurf\\_index.php](https://consurf.tau.ac.il/consurf_index.php)).

#### Highlighted residues conservation score key:

- conservation score of 7
- conservation score of 8
- conservation score of 9

**\*The residues chosen as the involved residues in the ABCG1 Polar relay that displayed polar linkages in a 3D setting.**

|                    |                                                                     |            |
|--------------------|---------------------------------------------------------------------|------------|
| XP_030661937.1     | MACLMAAFSVGTAMNASSYSAEMTEPKSVCVSVDEVVSSNMEAAETDLLNGHLKKVDNNL        | 60         |
| XP_004062897.1     | MACLMAAFSVGTAMNASSYSAEMMEPKSVCVSVDEVVSSNMEATETDLLNGHLKKVDNNL        | 60         |
| PNJ42434.1         | MACLMAAFSVGTAMNASSYSAEMMEPKSVCVSVDEVVSSNMEATETDLLNGHLKKVDNNL        | 60         |
| <b>NP_004906.3</b> | <b>MACLMAAFSVGTAMNASSYSAEMTEPKSVCVSVDEVVSSNMEATETDLLNGHLKKVDNNL</b> | <b>60</b>  |
| XP_003319138.2     | MACLMAAFSVGTAMNASSYSAEMTEPKSVCVSVDEVVSSNMEATETDLLNGHLKKVDNNL        | 60         |
|                    |                                                                     |            |
| XP_030661937.1     | TEAQRFSLLPRRAAVNIEFRDLSYSVPEGPWWRKKGYKTLLKGISGKFSSGELVAIMGPS        | 120        |
| XP_004062897.1     | TEAQRFSLLPRRAAVNIEFRDLSYSVPEGPWWRKKGYKTLLKGISGKFNSGELVAIMGPS        | 120        |
| PNJ42434.1         | TEAQRFSLLPRRAAVNIEFRDLSYSVPEGPWWRKKGYKTLLKGISGKFNSGELVAIMGPS        | 120        |
| <b>NP_004906.3</b> | <b>TEAQRFSLLPRRAAVNIEFRDLSYSVPEGPWWRKKGYKTLLKGISGKFNSGELVAIMGPS</b> | <b>120</b> |
| XP_003319138.2     | TEAQRFSLLPRRAAVNIEFRDLSYSVPEGPWWRKKGYKTLLKGISGKFNSGELVAIMGPS        | 120        |
|                    |                                                                     |            |
| XP_030661937.1     | GAGKSTLMNILAGYRETGMKGAVLINGLPRDLRCFRKVSCYIMQDDMLLPHLTVQEAMMV        | 180        |
| XP_004062897.1     | GAGKSTLMNILAGYRETGMKGAVLINGLPRDLRCFRKVSCYIMQDDMLLPHLTVQEAMMV        | 180        |
| PNJ42434.1         | GAGKSTLMNILAGYRETGMKGAVLINGLPRDLRCFRKVSCYIMQDDMLLPHLTVQEAMMV        | 180        |
| <b>NP_004906.3</b> | <b>GAGKSTLMNILAGYRETGMKGAVLINGLPRDLRCFRKVSCYIMQDDMLLPHLTVQEAMMV</b> | <b>180</b> |
| XP_003319138.2     | GAGKSTLMNILAGYRETGMKGAVLINGLPRDLRCFRKVSCYIMQDDMLLPHLTVQEAMMV        | 180        |
|                    |                                                                     |            |
| XP_030661937.1     | SAHLKLOEKDEGRREMVKEILTALGLLSCANTRTGSLSGGQRKRLAIALELVNPPVMFF         | 240        |
| XP_004062897.1     | SAHLKLOEKDEGRREMVKEILTALGLLSCANTRTGSLSGGQRKRLAIALELVNPPVMFF         | 240        |
| PNJ42434.1         | SAHLKLOEKDEGRREMVKEILTALGLLSCANTRTGSLSGGQRKRLAIALELVNPPVMFF         | 240        |
| <b>NP_004906.3</b> | <b>SAHLKLOEKDEGRREMVKEILTALGLLSCANTRTGSLSGGQRKRLAIALELVNPPVMFF</b>  | <b>240</b> |
| XP_003319138.2     | SAHLKLOEKDEGRREMVKEILTALGLLSCANTRTGSLSGGQRKRLAIALELVNPPVMFF         | 240        |

|                |                                                                |     |
|----------------|----------------------------------------------------------------|-----|
| XP_030661937.1 | DEPTSGLDASCFQVVS LMKGLAQGGRSIICTIHQPSAKLFELFDQLYVLSQGQCVRGK    | 300 |
| XP_004062897.1 | DEPTSGLDASCFQVVS LMKGLAQGGRSIICTIHQPSAKLFELFDQLYVLSQGQCVRGK    | 300 |
| PNJ42434.1     | DEPTSGLDASCFQVVS LMKGLAQGGRSIICTIHQPSAKLFELFDQLYVLSQGQCVRGK    | 300 |
| NP_004906.3    | DEPTSGLDASCFQVVS LMKGLAQGGRSIICTIHQPSAKLFELFDQLYVLSQGQCVRGK    | 300 |
| XP_003319138.2 | DEPTSGLDASCFQVVS LMKGLAQGGRSIICTIHQPSAKLFELFDKLYVLSQGQCVRGK    | 300 |
| XP_030661937.1 | VCNLVPYLRDLGLNCPITYHNPA DFMVEVASGEYGDQNSRLVRAVREGMCDSDHKRDLGGD | 360 |
| XP_004062897.1 | VCNLVPYLRDLGLNCPITYHNPA DFMVEVASGEYGDQNSRLVRAVREGMCDSDHKRDLGGD | 360 |
| PNJ42434.1     | VCNLVPYLRDLGLNCPITYHNPA DFMVEVASGEYGDQNSRLVRAVREGMCDSDHKRDLGGD | 360 |
| NP_004906.3    | VCNLVPYLRDLGLNCPITYHNPA DFMVEVASGEYGDQNSRLVRAVREGMCDSDHKRDLGGD | 360 |
| XP_003319138.2 | VCNLVPYLRDLGLNCPITYHNPA DFMVEVASGEYGDQNSRLVRAVREGMCDSDHKRDLGGD | 360 |
| XP_030661937.1 | AEVNPFLWHRPSEEVKQTKRLKGLRKDSSSMEGCHSF SASCLTQFCILFKRTFLSIMRDS  | 420 |
| XP_004062897.1 | AEVNPFLWHRPSEEVKQTKRLKGLRKDSSSMEGCHSF SASCLTQFCILFKRTFLSIMRDS  | 420 |
| PNJ42434.1     | AEVNPFLWHRPSEEVKQTKRLKGLRKDSSSMEGCHSF SASCLTQFCILFKRTFLSIMRDS  | 420 |
| NP_004906.3    | AEVNPFLWHRPSEEVKQTKRLKGLRKDSSSMEGCHSF SASCLTQFCILFKRTFLSIMRDS  | 420 |
| XP_003319138.2 | AEVNPFLWHRPSEEVKQTKRLKGLRKDSSSMEGCHSF SASCLTQFCILFKRTFLSIMRDS  | 420 |
| XP_030661937.1 | VLTHLRITSHIGIGLLIGLLYLIGIGNEAKKVL SNSGFLFFSMLFLMFAALMPTVLTFPLE | 480 |
| XP_004062897.1 | VLTHLRITSHIGIGLLIGLLYLIGIGNEAKKVL SNSGFLFFSMLFLMFAALMPTVLTFPLE | 480 |
| PNJ42434.1     | VLTHLRITSHIGIGLLIGLLYLIGIGNEAKKVL SNSGFLFFSMLFLMFAALMPTVLTFPLE | 480 |
| NP_004906.3    | VLTHLRITSHIGIGLLIGLLYLIGIGNEAKKVL SNSGFLFFSMLFLMFAALMPTVLTFPLE | 480 |
| XP_003319138.2 | VLTHLRITSHIGIGLLIGLLYLIGIGNEAKKVL SNSGFLFFSMLFLMFAALMPTVLTFPLE | 480 |
| XP_030661937.1 | MGVFLREHLNYWYSLKAYYLAKTMADVPFQIMFPVAYCSIVYWMTSQPSDAVRFVLFAAL   | 540 |
| XP_004062897.1 | MGVFLREHLNYWYSLKAYYLAKTMADVPFQIMFPVAYCSIVYWMTSQPSDAVRFVLFAAL   | 540 |
| PNJ42434.1     | MGVFLREHLNYWYSLKAYYLAKTMADVPFQIMFPVAYCSIVYWMTSQPSDAVRFVLFAAL   | 540 |
| NP_004906.3    | MGVFLREHLNYWYSLKAYYLAKTMADVPFQIMFPVAYCSIVYWMTSQPSDAVRFVLFAAL   | 540 |
| XP_003319138.2 | MGVFLREHLNYWYSLKAYYLAKTMADVPFQIMFPVAYCSIVYWMTSQPSDAVRFVLFAAL   | 540 |
| XP_030661937.1 | GTMTSLVAQSLGLLIGAASTSLQVATFVGVPVTAIPVLLFSGFFVSFDTIPTYLOWMSYIS  | 600 |
| XP_004062897.1 | GTMTSLVAQSLGLLIGAASTSLQVATFVGVPVTAIPVLLFSGFFVSFDTIPTYLOWMSYIS  | 600 |
| PNJ42434.1     | GTMTSLVAQSLGLLIGAASTSLQVATFVGVPVTAIPVLLFSGFFVSFDTIPTYLOWMSYIS  | 600 |
| NP_004906.3    | GTMTSLVAQSLGLLIGAASTSLQVATFVGVPVTAIPVLLFSGFFVSFDTIPTYLOWMSYIS  | 600 |
| XP_003319138.2 | GTMTSLVAQSLGLLIGAASTSLQVATFVGVPVTAIPVLLFSGFFVSFDTIPTYLOWMSYIS  | 600 |
| XP_030661937.1 | YVRYGFEGVILSIYGLDREDLHCDIDETCHFQKSEAILRELIVENAKLYLDFIVLGIFFI   | 660 |
| XP_004062897.1 | YVRYGFEGVILSIYGLDREDLHCDIDETCHFQKSEAILRELIVENAKLYLDFIVLGIFFI   | 660 |
| PNJ42434.1     | YVRYGFEGVILSIYGLDREDLHCDIDETCHFQKSEAILRELIVENAKLYLDFIVLGIFFI   | 660 |
| NP_004906.3    | YVRYGFEGVILSIYGLDREDLHCDIDETCHFQKSEAILRELIVENAKLYLDFIVLGIFFI   | 660 |
| XP_003319138.2 | YVRYGFEGVILSIYGLDREDLHCDIDETCHFQKSEAILRELIVENAKLYLDFIVLGIFFI   | 660 |
| XP_030661937.1 | SLRLIAYFVLR YKIRAER678                                         |     |
| XP_004062897.1 | SLRLIAYFVLR YKIRAER678                                         |     |
| PNJ42434.1     | SLRLIAYFVLR YKIRAER678                                         |     |
| NP_004906.3    | SLRLIAYFVLR YKIRAER678                                         |     |
| XP_003319138.2 | SLRLIAYFVLR YKIRAER678                                         |     |
